# Supplementary material for: High performance PdxCuy bimetal catalysts with adjustable Faraday current efficiency for nitrogen fixation
Source: Royal Society of Chemistry journal article supplement (doi:10.1039/d1qi00258a), 2021-01-01
Supplement: d1qi00258a1.pdf [file d1qi00258a1.pdf]

## Support information

### High Performance Pd<sub>x</sub>Cu<sub>y</sub> Bimetal Catalysts With Adjustable Faraday Current Efficiency for Nitrogen Fixation

*Hongxi Zhang<sup>a,b</sup>, Zengyao Wang<sup>a,b</sup>, Jianfeng Shen<sup>a\*</sup>, Mingxin Ye<sup>a\*</sup>*

<sup>a</sup> Institute of special materials and technology, Fudan University, Shanghai 200433,  
China

<sup>b</sup> Department of Chemistry, Fudan University, Shanghai 200433, China

E-mail: [mxye@fudan.edu.cn](mailto:mxye@fudan.edu.cn), [jfshen@fudan.edu.cn](mailto:jfshen@fudan.edu.cn)

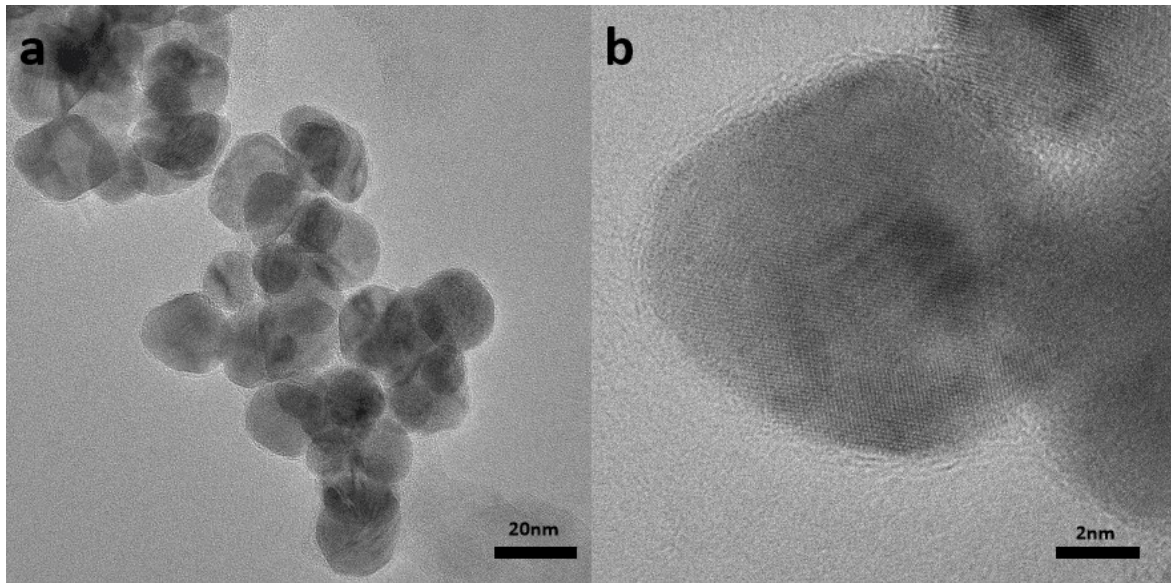

**Figure S1.**(a,b) TEM images of PdCu.

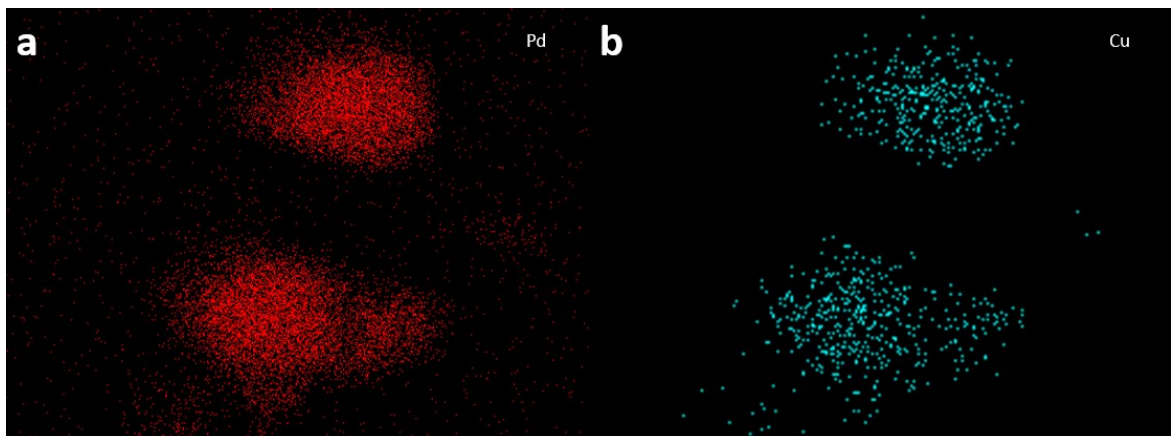

**Figure S2.**(a,b) TEM-EDS mapping of PdCu.

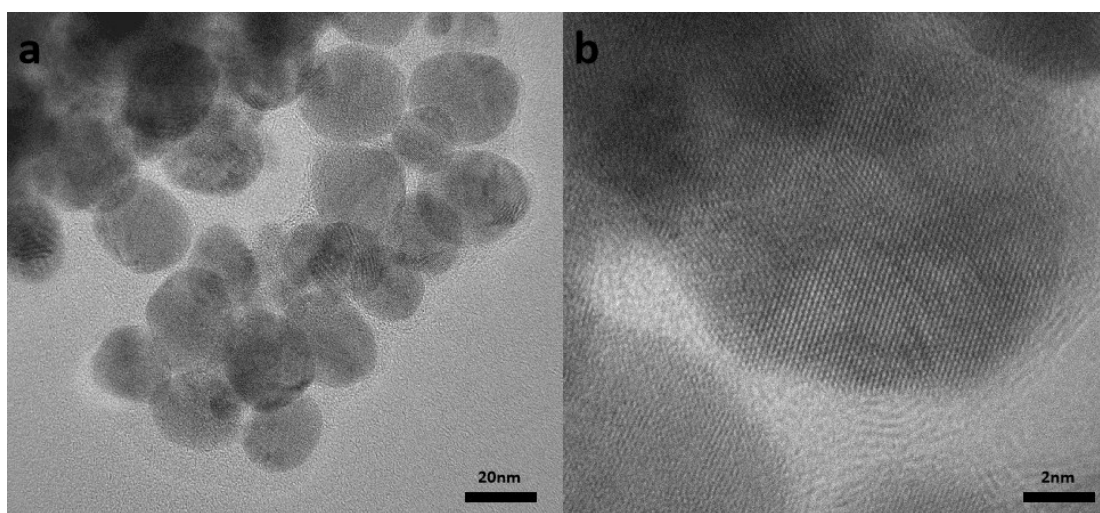

Figure S3. (a,b) TEM image of Pd<sub>3</sub>Cu.

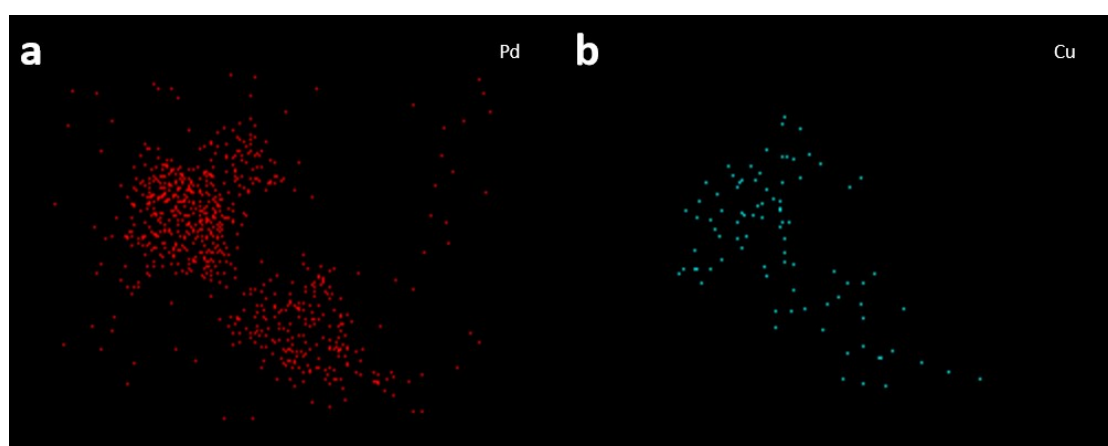

Figure S4.(a,b) TEM-EDS mapping of Pd<sub>3</sub>Cu.

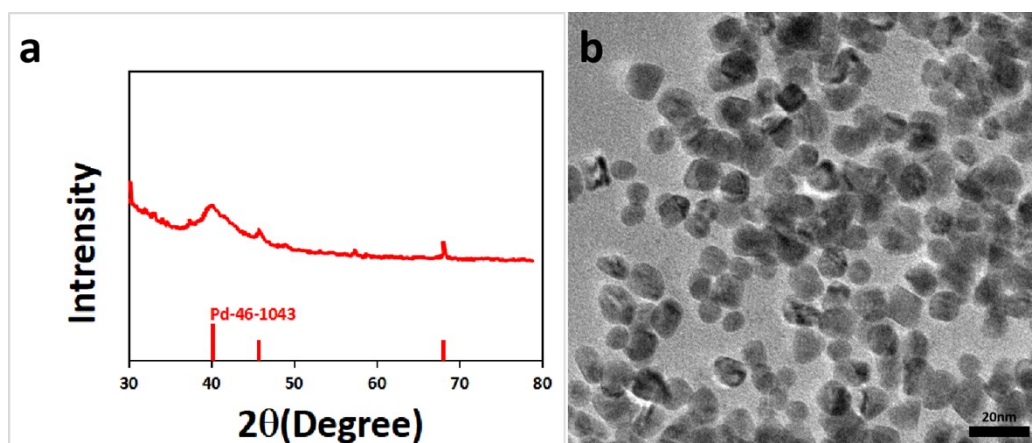

Figure S5. (a) XRD pattern and (b) TEM image of Pd.

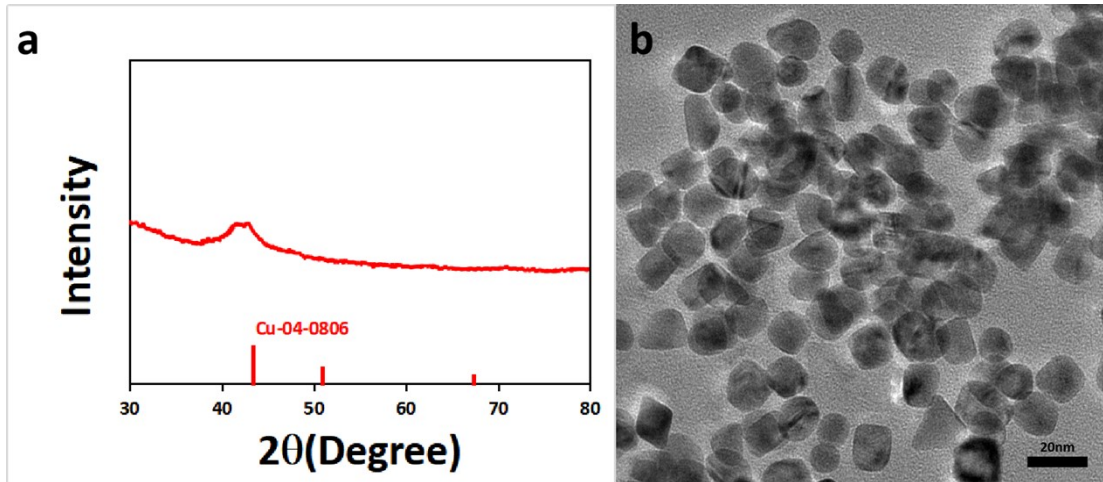

Figure S6.(a) XRD pattern and (b) TEM image of Cu.

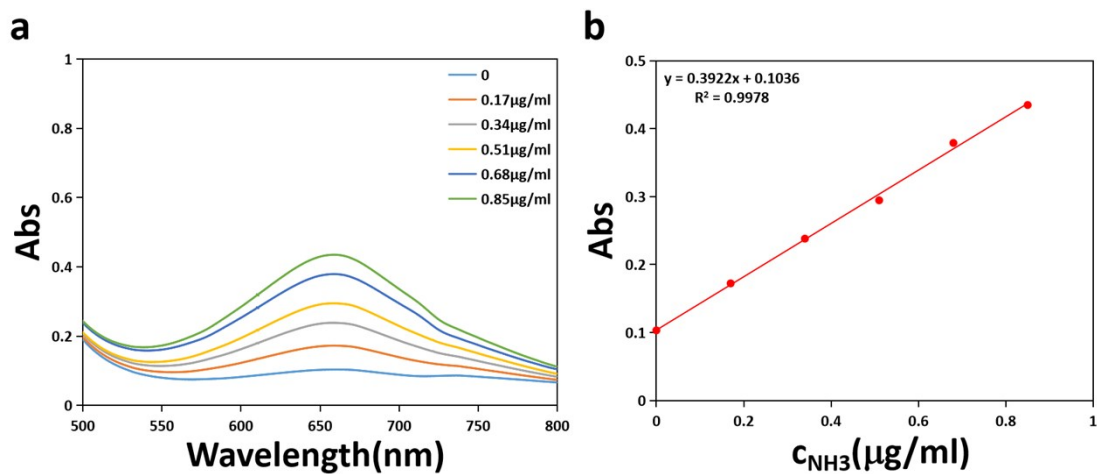

Figure S7.(a) UV-Vis curves of indophenol assays with  $\text{NH}_4^+$  ions after incubated for 1 h at room temperature. (b) Calibration curve used for estimation of  $\text{NH}_3$  by  $\text{NH}_4^+$  ion concentration. The fitting curve shows good linear relation of absorbance with  $\text{NH}_4^+$  ion concentration ( $y = 0.3922x + 0.1036$ ,  $R^2=0.9978$ ) for three independent calibration curves.

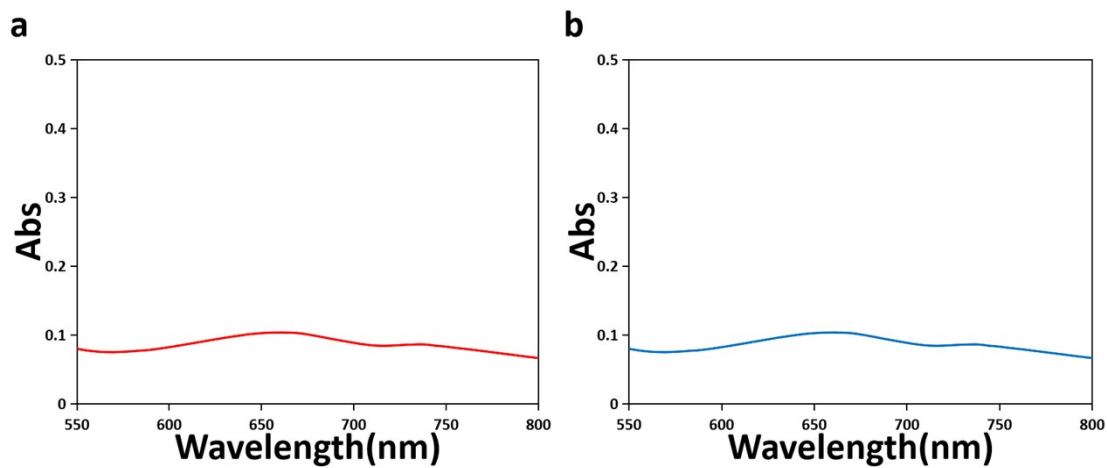

**Figure S8.** (a)UV-vis spectra of 0.1M HCl and (b) after 2h reaction with Ar by the indoxyl blue method.

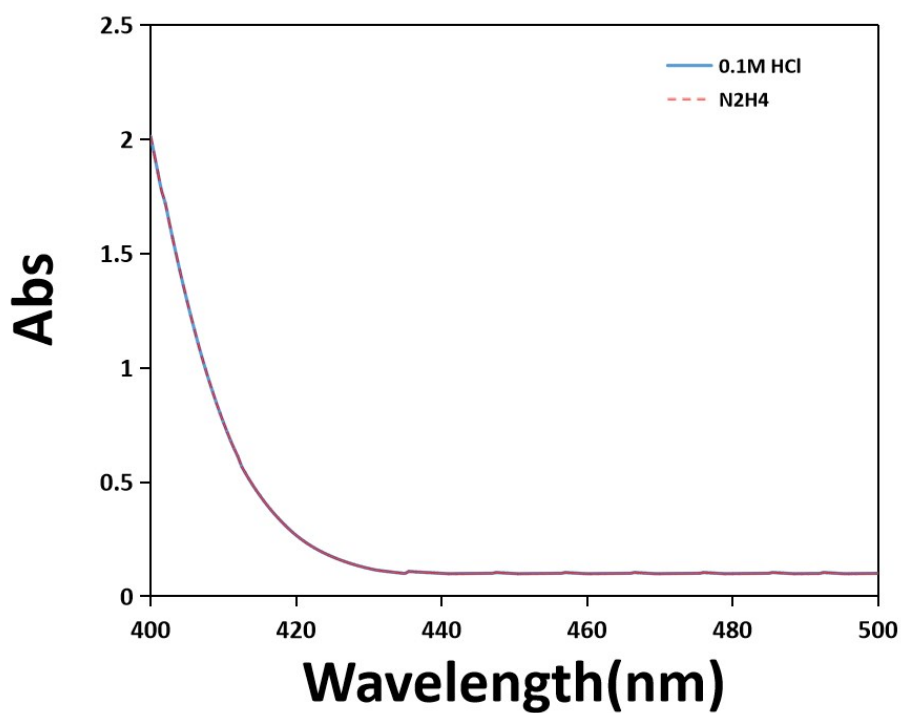

**Figure S9.** UV-vis spectrum for the potential by-product  $N_2H_4$ .

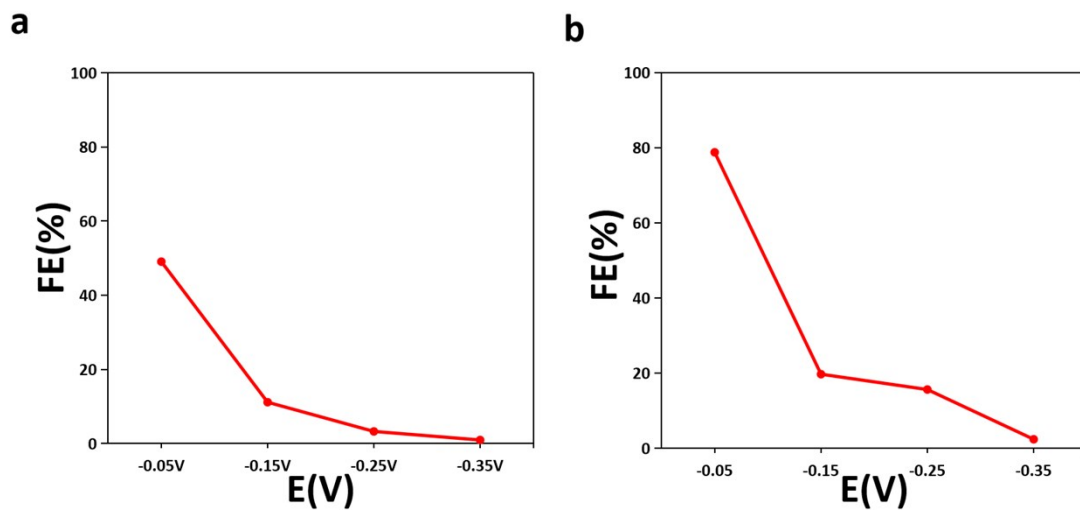

Figure S10.(a) FE of Pd<sub>3</sub>Cu and (b) PdCu<sub>3</sub>.

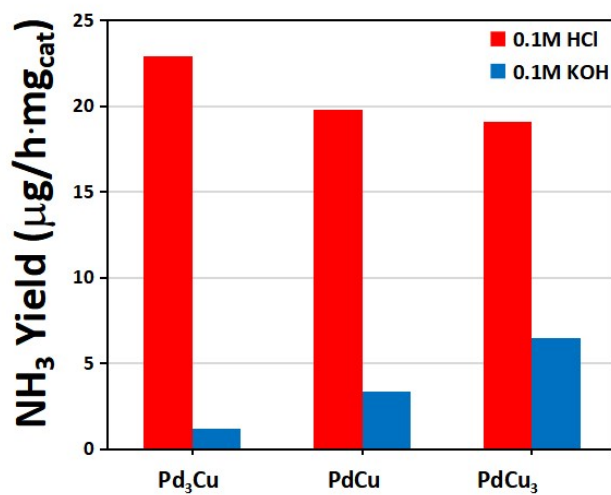

Figure S11. NH<sub>3</sub> yields of Pd<sub>x</sub>Cu<sub>y</sub> at 0.1M HCl and 0.1M KOH.

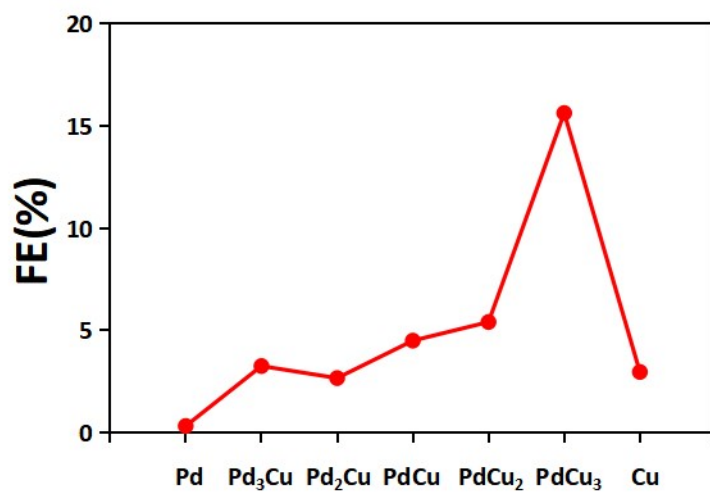

**Figure S12.** FE of Pd<sub>x</sub>Cu<sub>y</sub> with more Pd/Cu atom ratio.

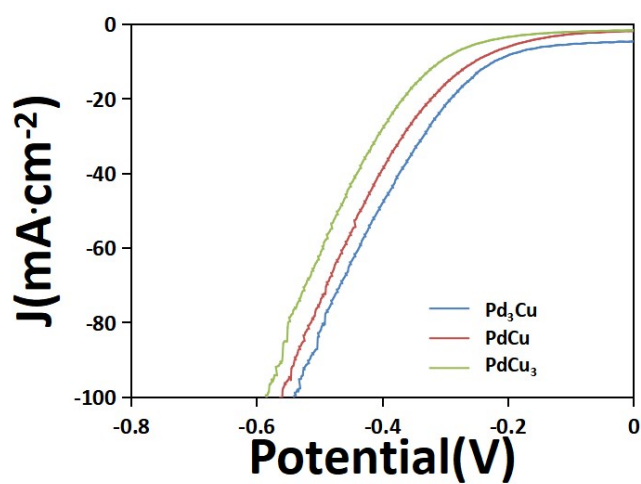

**Figure S13.** LSV curves of Pd<sub>3</sub>Cu, PdCu and PdCu<sub>3</sub> bimetal catalysts in 0.05M H<sub>2</sub>SO<sub>4</sub>.

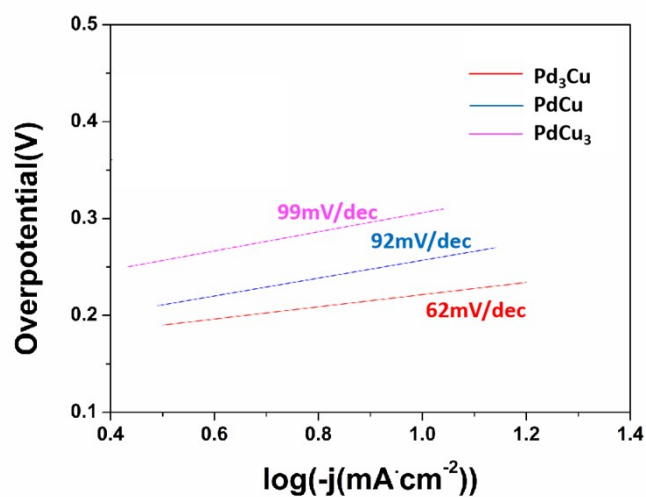

**Figure S14.** Tafel plots at -0.25V vs RHE. of Pd<sub>3</sub>Cu, PdCu and PdCu<sub>3</sub> bimetal catalysts in 0.05M H<sub>2</sub>SO<sub>4</sub>.

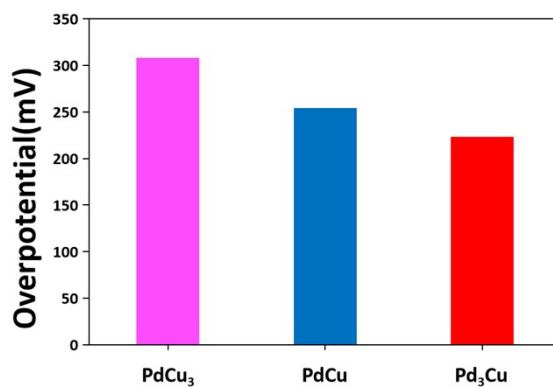

**Figure S15.** Overpotential of Pd<sub>3</sub>Cu, PdCu and PdCu<sub>3</sub> bimetal catalysts at 10 mA·cm<sup>-2</sup> in 0.05M H<sub>2</sub>SO<sub>4</sub>.



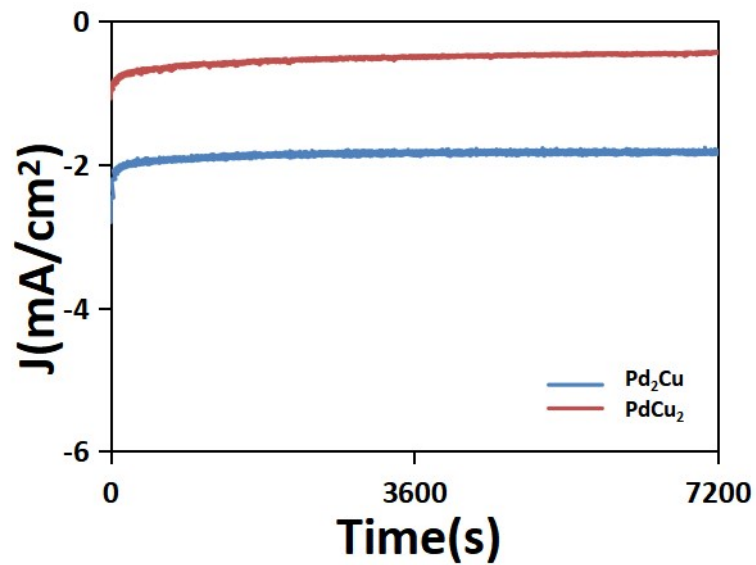

Figure S16. i-t curves at -0.25V vs. RHE. of Pd<sub>2</sub>Cu and PdCu<sub>2</sub>.

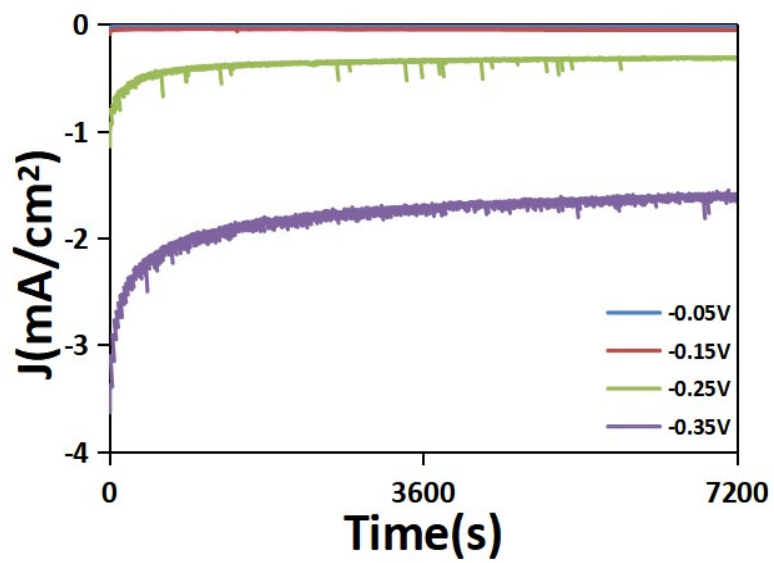

Figure S17. i-t curves of PdCu<sub>3</sub> at different potentials.

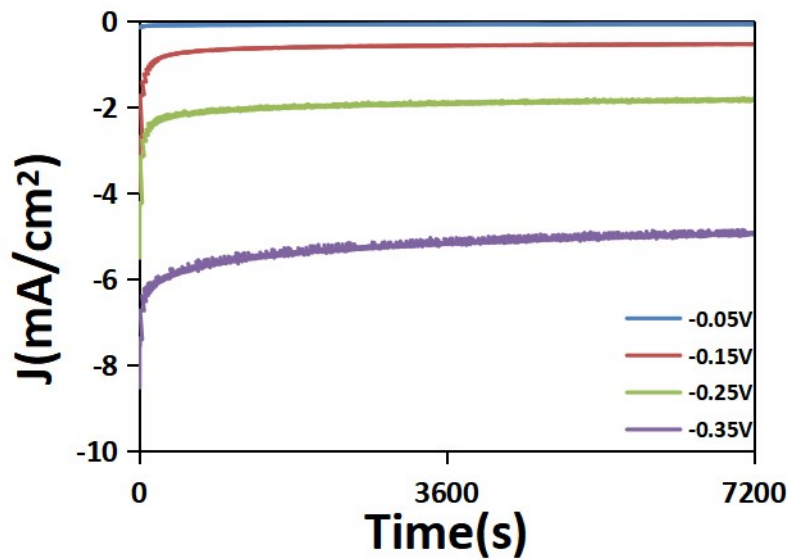

Figure S18. i-t curves at different potentials of Pd<sub>3</sub>Cu.

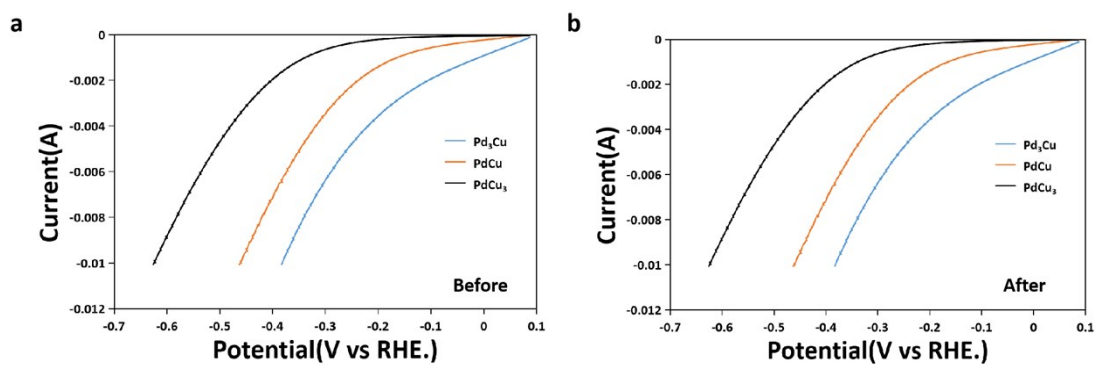

Figure S19. (a) LSV curves of Pd<sub>3</sub>Cu, PdCu and PdCu<sub>3</sub> bimetal catalysts before NRR test and (b) LSV curves after NRR test.

**Table S1. NH<sub>3</sub> yield and FE of different materials**

| Catalysts                                                        | Electrolyte                              | Yield/ $\mu\text{g}\cdot\text{h}^{-1}\cdot\text{mg}^{-1}$<br>$I_{\text{cat}}$ | FE/%  | Ref.                                                      |
|------------------------------------------------------------------|------------------------------------------|-------------------------------------------------------------------------------|-------|-----------------------------------------------------------|
| <b>PdCu<sub>3</sub> nanoparticles</b>                            | 0.1 M HCl                                | 19.1                                                                          | 15.62 | This work                                                 |
| Flower-like Au                                                   | 0.1 M HCl                                | 25.57                                                                         | 6.05  | <i>ACV MATER</i> 2017, <b>29</b> , 1700001                |
| Au/CeO <sub>x</sub> -RGO                                         | 0.1 M HCl                                | 8.3                                                                           | 10.1  | <i>CHEMSUSCHEM</i> , 2018, <b>11</b> , 3480-3485.         |
| Bi <sub>4</sub> V <sub>2</sub> O <sub>11</sub> -CeO <sub>2</sub> | 0.1 M HCl                                | 23.21                                                                         | 10.16 | <i>SMALL METHODS</i> , 2018, <b>3</b> , 1800333.          |
| CoO/RGO                                                          | 0.1 M<br>Na <sub>2</sub> SO <sub>4</sub> | 21.5                                                                          | 8.3   | <i>J MATER CHEM A</i> , 2019, <b>7</b> , 4389-4394.       |
| Hierarchical CoP hollow nanocages                                | 1 M KOH                                  | 10.78                                                                         | 7.36  | <i>SMALL METHODS</i> , 2018, <b>2</b> , 1800204.          |
| Cr <sub>2</sub> O <sub>3</sub> nanofiber                         | 0.1 M HCl                                | 28.13                                                                         | 8.56  | <i>CHEM COMMUN</i> , 2018, <b>54</b> , 12848-12851.       |
| Cr <sub>2</sub> O <sub>3</sub> /RGO                              | 0.1 M HCl                                | 33.3                                                                          | 7.33  | <i>INORG CHEM</i> , 2019, <b>58</b> , 2257-2260.          |
| Multishelled hollow Cr <sub>2</sub> O <sub>3</sub> microspheres  | 0.1 M<br>Na <sub>2</sub> SO <sub>4</sub> | 25.3                                                                          | 6.78  | <i>ACS CATAL</i> , 2018, <b>8</b> , 8540-8544.            |
| Ti <sub>3</sub> C <sub>2</sub> T <sub>x</sub> MXene nanosheets   | 0.1 M HCl                                | 20.4                                                                          | 9.3   | <i>J MATER CHEM A</i> , 2018, <b>6</b> , 24031-24035.     |
| Fe <sub>2</sub> O <sub>3</sub> nanorods                          | 0.1 M<br>Na <sub>2</sub> SO <sub>4</sub> | 15.9                                                                          | 0.94  | <i>CHEMCATCHEM</i> , 2018, <b>10</b> , 4530-4535.         |
| $\beta$ -FeOOH nanorods                                          | 0.5 M<br>LiClO <sub>4</sub>              | 23.32                                                                         | 6.7   | <i>CHEM COMMUN</i> , 2018, <b>54</b> , 11332-11335.       |
| Nb <sub>2</sub> O <sub>5</sub> nanofiber                         | 0.1 M HCl                                | 43.6                                                                          | 9.26  | <i>NANO ENERGY</i> , 2018, <b>52</b> , 264-270.           |
| Mo <sub>2</sub> C-C                                              | 0.5 M<br>Li <sub>2</sub> SO <sub>4</sub> | 11.3                                                                          | 7.8   | <i>ADV MATER</i> , 2018, <b>30</b> , 1803694.             |
| Pd-Ru with porous nanostructures                                 | 0.1 M HCl                                | 25.92                                                                         | 1.53  | <i>ACS SUSTAIN CHEM ENG</i> , 2018, <b>7</b> , 2400-2405. |
| Pd-Ru tripods                                                    | 0.1 M KOH                                | 37.23                                                                         | 1.85  | <i>J MATER CHEM A</i> , 2019, <b>7</b> , 801-805.         |
| PdCuIr                                                           | 0.1 M<br>Na <sub>2</sub> SO <sub>4</sub> | 13.43                                                                         | 5.29  | <i>J MATER CHEM A</i> , 2019, <b>7</b> , 3190-3196.       |
| Polymeric carbon nitride                                         | 0.1 M HCl                                | 8.09                                                                          | 11.59 | <i>ANGEW CHEM INT ED</i> , 2018, <b>57</b> , 10246-10250. |
